# Supplementary material
Source: Research Square preprint supplement (doi:10.21203/rs.3.rs-7039328/v1)
Supplement: Supplementary file 1 [file 3f989f04fac7911729e266c6.pdf]

1 **Mid-mantle discontinuities beneath subduction**  
2 **zones linked to depth-dependent deformation of**  
3 **bridgmanite**

4 John Keith Magali<sup>1</sup>, Sébastien Merkel<sup>2</sup>, Angelo Pisconti<sup>1</sup>, Jeffrey Gay<sup>3</sup>,  
James Wookey<sup>4</sup>, Christine Thomas<sup>1,5</sup>

5 <sup>1</sup>Institute of Geophysics, University of Münster, Corrensstr. 24, 48149 Münster,  
6 Germany

7 <sup>2</sup>Univ. Lille, CNRS, INRAE, Centrale Lille, UMR 8207 - UMET - Unité  
8 Matériaux et Transformations, F-59000 Lille, France

9 <sup>3</sup>Dept. of Geosciences, Princeton University, Princeton, NJ 08544, USA.

10 <sup>4</sup>School of Earth Sciences, University of Bristol, Wills Memorial Building,  
11 Queens Road, Bristol BS8 1RJ, UK

12 <sup>5</sup>Geological Survey of Denmark and Greenland, Copenhagen, Denmark

# 13 Contents of this file and brief descriptions

14 Supplementary Texts 1 to 3

15 Supplementary Tables 1 to 3

16 Supplementary Figures 1 to 13

17 All figures shown here, except Supplementary Figs. 12 and 13, are referenced in the Main  
18 Text only. Below, we provide their brief descriptions.

19 Supplementary Figures 1 and 2: Calculated natural strain and anisotropic discontinuity for the  
20 stagnant slab model.

21 Supplementary Figures 3 and 4: Additional reflection coefficient calculations and waveform  
22 modeling results for the penetrating slab model.

23 Supplementary Figure 5: Predicted radial anisotropy for the stagnant slab model.

24 Supplementary Figure 6: Predicted and observed shear wave splitting delay times beneath  
25 Western Java.

26 Supplementary Figures 7 and 8: VPSC modeling results for compression and simple shear.

27 Supplementary Figure 9: Calculated seismic anisotropy assuming fast fabric transitions.

28 Supplementary Figure 10: Seismic velocity model of a harzburgitic slab.

29 Supplementary Figure 11: Wavefield scanning results from AxiSEM3D.

## 30 1 Rheological parameters in the free subduction model

31 The effective mantle viscosity  $\eta_{\text{eff}}$  is defined as<sup>1</sup>:

$$\eta_{\text{eff}}(z, P, T, \dots) = \eta_0(z) \frac{\eta_{\text{VP}}(P, T, \dots)}{\eta_{\text{min}}}, \quad (1)$$

32 where  $\eta_{\min}$  is the minimum viscosity capped at  $\eta_{\min} = 1.0 \times 10^{20}$  Pa · s, and  $\eta_0(z)$  and  $\eta_{vp}(P, T, \dots)$   
33 are the depth-dependent<sup>2</sup> and viscoplastic terms<sup>3,4</sup>, respectively. The specific formulations of  
34  $\eta_0$  and  $\eta_{vp}$  governing the rheology of intra-oceanic subduction in our model are detailed in ref.<sup>5</sup>.  
35 The values of the parameters are specified in Supplementary Tables 1 and 2.

## 36 **2 Transformation textures as cause for intraslab anisotropy**

37 Modeling intraslab anisotropy is still at its infancy, and so we assume that any hint of fossil  
38 fabric is completely overprinted by transformation textures during the ringwoodite-bridgmanite  
39 phase transition<sup>6</sup>. Due to negligible intraslab deformation, transformation textures only undergo  
40 rigid body rotation which would explain the 90° rotation of S-wave anisotropy around the  $y$ -axis  
41 when the slab orientation changes from vertical to horizontal and vice versa (Supplementary Fig.  
42 13). There is no first-order comparison between our intraslab anisotropy model and tomography,  
43 mainly due to limited tomographic resolution; meanwhile, we anticipate that it is detectable by  
44 source-side shear wave splitting (SWS) when the direct S wave is oriented nearly parallel to the  
45 slab dip<sup>7,8</sup>. This is demonstrated in the bottom panels of Supplementary Fig. 13 showing  $V_S$   
46 anisotropy pole figures. Here, source-side shear wave splitting measurements are expected to be:  
47 (1) both detectable in both updip and downdip directions at longer epicentral distances (i.e.,  
48 steeper incidence angles) when the slab is oriented horizontally ( $V_{SH} > V_{SV}$ ), (2) undetectable  
49 in both directions when the slab is vertical regardless of distance and azimuth ( $V_{SV} > V_{SH}$ ), and  
50 (3) detectable only in the updip direction at the zone where the slab contorts in the NW-SE  
51 direction ( $V_{SH} \sim V_{SV}$ ).

52 Due to the lack of SWS observations on deep intraslab anisotropy beneath Western Java, we  
53 instead compare our intraslab anisotropy model with that of the Nazca slab, characterized by a  
54 comparable slab geometry<sup>9</sup>. Yet, our model cannot explain the along-strike intraslab anisotropy  
55 observed within the Nazca slab<sup>7,8</sup>. Although anisotropy resulting from the preferential alignment  
56 of serpentized faults could lead to such observations<sup>10</sup>, the fact that their stability remains  
57 inconclusive with increasing pressure<sup>11</sup>, and that the length scale of these hydrous laminations

58 remain thin makes them difficult to constrain by SWS measurements<sup>7</sup>. To reconcile the preser-  
59 vation of transformation textures within the slab as cause for the observed splitting<sup>6,12</sup>, the most  
60 plausible scenario to exhibit trench-parallel anisotropy warrants along-strike buckling of the slab  
61 resulting from 3D flow.

### 62 **3 Anisotropic reflection calculations**

63 To ensure that an anisotropic discontinuity is solely responsible for the generation of reflection  
64 coefficients, we remove the effect of variations in the isotropic velocities with pressure  $P$  and  
65 temperature  $T$  when we choose a top and bottom layer for calculating reflections. This is  
66 accomplished by selecting a node in the elastic medium  $\mathbf{c}(x, z)$  where the anisotropic discontinuity  
67 interface is presumed to be located. The criteria for selecting such node is based on a grid search  
68 method with depth where the gradient of the anisotropy discontinuity with depth is zero. Since  
69 the spatial resolution of  $\mathbf{c}(x, z)$  is chosen ad-hoc, and hence finite, the node closest to the depth  
70 at which the local minima in the anisotropy index is found (i.e.,  $\frac{d}{dz}(\text{anisotropy index}) = 0$ ) is  
71 chosen as the anisotropic interface. The elastic tensor corresponding to this interface is called  
72  $\mathbf{c}_{\text{mid}}$ . Then, using the elastic decomposition method of ref.<sup>13</sup>, the isotropic tensors of the top and  
73 bottom layers which are chosen to be the nodes that are vertically adjacent to  $\mathbf{c}_{\text{mid}}$  are removed,  
74 and in turn replaced with that of the middle node (i.e., the interface). The densities of the top  
75 and bottom layers are also replaced with that of the middle node.

Supplementary Table 1: Viscoplastic rheology parameters for both stagnant and penetrating models

| Parameter                | Symbol*  | Subducting crust      | Subducting lithosphere | Overriding plate       | Background mantle      | Unit                                                |
|--------------------------|----------|-----------------------|------------------------|------------------------|------------------------|-----------------------------------------------------|
| Density                  | $\rho$   | 3150                  | 3350                   | 3350                   | 3350                   | $\text{kg} \cdot \text{m}^{-3}$                     |
| Thermal diffusivity      | $k$      | $1.0 \times 10^{-6}$  | $1.0 \times 10^{-6}$   | $1.0 \times 10^{-6}$   | $1.0 \times 10^{-6}$   | $\text{m}^2 \cdot \text{s}^{-1}$                    |
| Heat capacity            | $C_p$    | 1250                  | 1250                   | 1250                   | 1250                   | $\text{J} \cdot \text{K}^{-1} \cdot \text{kg}^{-1}$ |
| <i>Dislocation creep</i> |          |                       |                        |                        |                        |                                                     |
| Activation energy        | $E$      | 0                     | $5.4 \times 10^5$      | $4.3 \times 10^5$      | $4.3 \times 10^5$      | $\text{J} \cdot \text{mol}^{-1}$                    |
| Activation volume        | $V$      | 0                     | $2.0 \times 10^{-5}$   | $1.85 \times 10^{-5}$  | $1.5 \times 10^{-5}$   | $\text{mol}^3 \cdot \text{mol}^{-1}$                |
| Prefactor                | $V$      | $1.0 \times 10^{-19}$ | $2.4 \times 10^{-16}$  | $2.42 \times 10^{-16}$ | $3.91 \times 10^{-15}$ | $\text{Pa}^{-n} \cdot \text{s}^{-1}$                |
| Stress exponent          | $n$      | 1.0                   | 3.5                    | 3.5                    | 3.0                    | –                                                   |
| <i>Diffusion creep</i>   |          |                       |                        |                        |                        |                                                     |
| Activation energy        | $E$      | 0                     | $3.0 \times 10^5$      | $2.4 \times 10^5$      | $2.4 \times 10^5$      | $\text{J} \cdot \text{mol}^{-1}$                    |
| Activation volume        | $V$      | 0                     | $5.0 \times 10^{-6}$   | $5.0 \times 10^{-6}$   | $2.5 \times 10^{-6}$   | $\text{mol}^3 \cdot \text{mol}^{-1}$                |
| Prefactor                | $V$      | $1.0 \times 10^{-19}$ | $6.08 \times 10^{-14}$ | $6.08 \times 10^{-14}$ | $3.74 \times 10^{-14}$ | $\text{Pa}^{-n} \cdot \text{s}^{-1}$                |
| <i>Plastic yielding</i>  |          |                       |                        |                        |                        |                                                     |
| Cohesion                 | $C$      | $1.0 \times 10^{15}$  | $1.0 \times 10^6$      | $1.0 \times 10^{15}$   | $1.0 \times 10^6$      | MPa                                                 |
| Internal friction angle  | $\theta$ | 0                     | 20                     | 0                      | 20                     | °                                                   |

\*Chosen values are loosely constrained from<sup>14</sup>. To facilitate slab stagnation, we impose a viscosity jump by a factor of  $\sim 5$  at 660 km in the depth-dependent model. Unless stated otherwise, all remaining parameters in ASPECT’s viscoplastic material model are retained at their default settings.

Supplementary Table 2: Phase transition parameters in the mantle transition zone.

| Parameter, penetrating/stagnant | 410 km                              | 520 km                              | 660 km                                | Unit                            |
|---------------------------------|-------------------------------------|-------------------------------------|---------------------------------------|---------------------------------|
| Clapeyron slope                 | $2.5 \times 10^6 / 2.5 \times 10^6$ | $0.5 \times 10^6 / 0.5 \times 10^6$ | $-0.5 \times 10^6 / -2.1 \times 10^6$ | $\text{Pa} \cdot \text{K}^{-1}$ |
| Density contrast*               | 370/370                             | 130/130                             | 320/320                               | $\text{kg} \cdot \text{m}^{-3}$ |
| Phase transition width          | 10/10                               | 5/5                                 | 5/10                                  | km                              |
| Phase transition temperature    | 1750/1750                           | 1850/1850                           | 1900/1900                             | K                               |

\*Density contrasts are reminiscent of the pyrolite model.

Supplementary Table 3: First-order polynomial coefficients that fit the critically-resolved shear stresses (CRSS)  $\tau_0$  of bridgmanite as a function of pressure  $P$  according to the VPSC calculation of ref.<sup>15</sup>. The linear expression follows the form  $\tau_0(P)_{\langle uvw \rangle \{ hkl \}} = A_1 P + A_2$  where  $\langle uvw \rangle \{ hkl \}$  is a slip system. Note that  $\tau_0$  only refers to relative CRSS values in the VPSC calculations.

|       | (100)[010] | (100)[001] | (100) $\langle$ 011 | (010)[100] | (010)[001] | (010) $\langle$ 101 | (001)[100] | (001)[010] | (001) $\langle$ 110 | {111} $\langle$ 110 |
|-------|------------|------------|---------------------|------------|------------|---------------------|------------|------------|---------------------|---------------------|
| $A_1$ | 0.0095     | 0.0143     | 0.0095              | -0.01360   | -0.0047    | 0.0045              | -0.0095    | 0.0047     | 0.0                 | 0.0                 |
| $A_2$ | -0.0762    | -0.3142    | 0.0238              | 0.7818     | 0.3381     | 0.1727              | 0.6762     | 0.5381     | 0.5                 | 3.0                 |

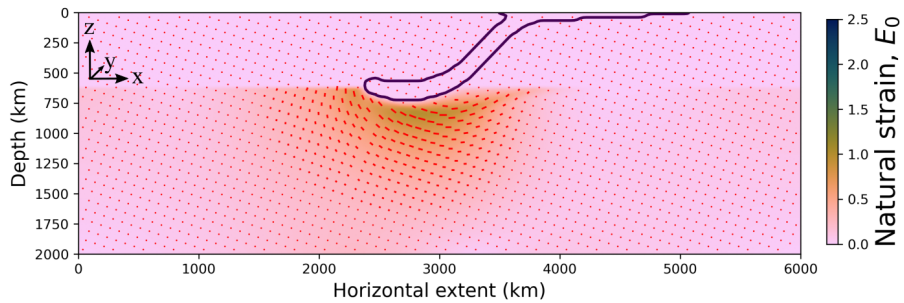

Supplementary Figure 1: **Natural strains in the lower mantle for the stagnant slab model.** Amount of accumulated deformation in the present time in terms of the finite strain ellipse (red arrow-less vectors) for a slab that is stagnating at the 660-km ringwoodite→bridgmanite phase transition boundary. The color map pertains to the natural strain  $E_0$  defined as  $E_0 = \frac{1}{2} \ln(\zeta_1/\zeta_3)$  where  $\zeta_1$  and  $\zeta_3$  are the long and short axes, respectively, of the finite strain ellipse.

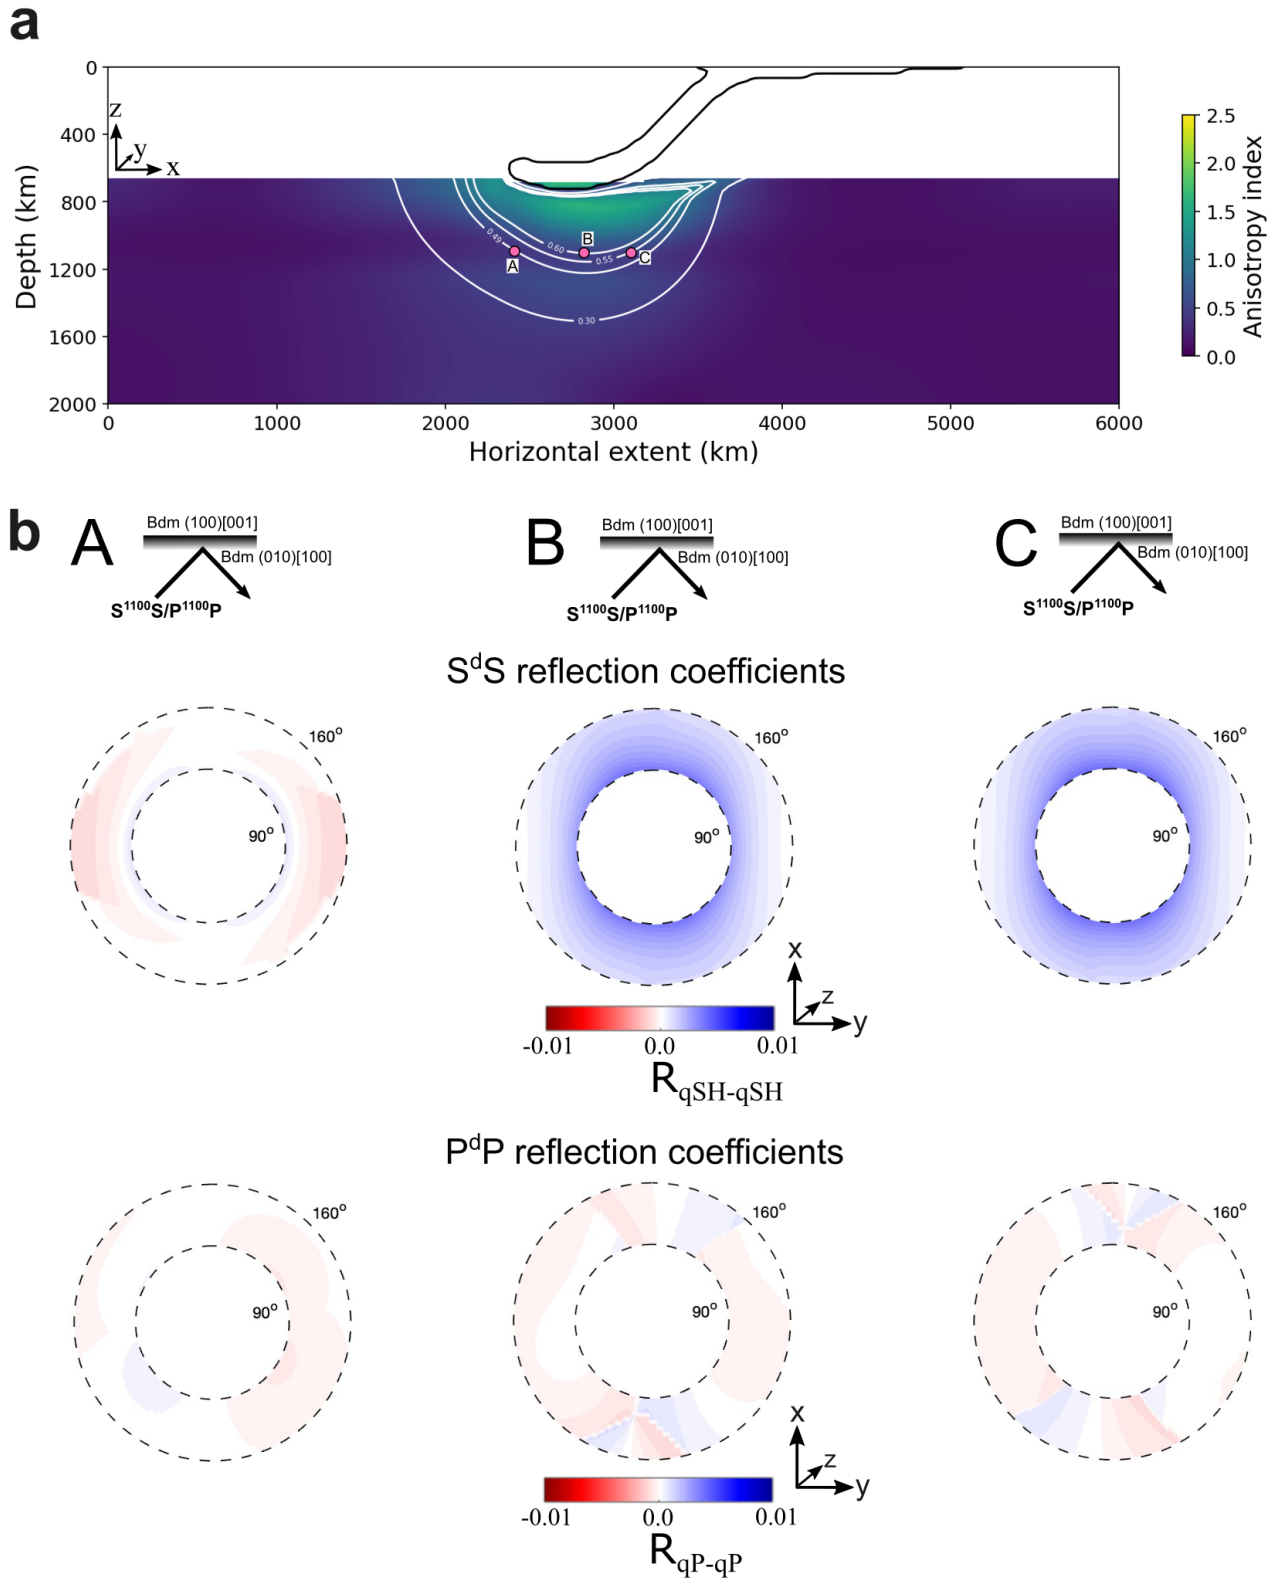

Supplementary Figure 2: **Anisotropic discontinuity for the stagnant slab model.** **a**, Anisotropy index for the stagnant slab model. Solid purple circles are the selected interfaces: Location A, Location B, and Location C along the anisotropic discontinuity where reflection coefficients are to be computed. **b**, Anisotropic reflection coefficients for qSH-qSH and qP-qP based on S<sup>d</sup>S and P<sup>d</sup>P phases, respectively. Despite persistence at 1000 km, the anisotropic discontinuity is very weak due to reduced strains.

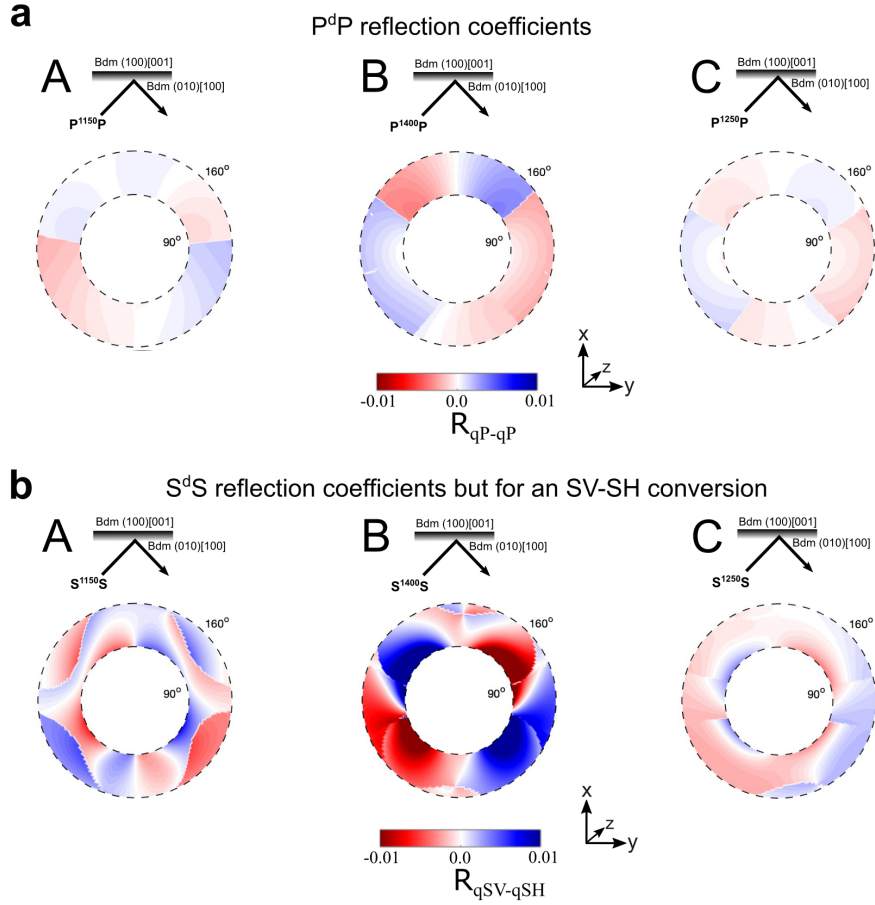

Supplementary Figure 3: **Supplementary reflection coefficients for the penetrating slab model.** **a**, Pole figure representation of  $qP$ - $qP$  reflection coefficients with epicentral distance and azimuth at Locations A, B, and C in Fig. 2 of the Main Text suggestive of  $P^dP$  underside reflections off the anisotropic discontinuity. **b**, Same as (a) but for a  $qSV$ - $qSH$  conversion. Such a conversion may arise due to the cross coupling of SH and SV motions for incident S-waves propagating in a generally anisotropic media<sup>16</sup> such as the penetrating slab model considered here.

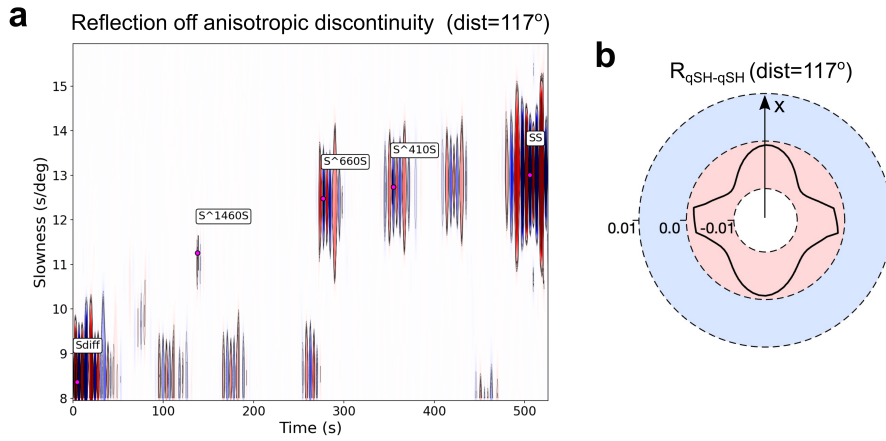

Supplementary Figure 4: **Detectability of the anisotropic discontinuity from a slightly larger distance.** **a**, Slowness vespagram for the fully-anisotropic mantle model. The measured distance from the source to the central receiver is  $117^\circ$ . **b**, Predicted reflection coefficients as a function of azimuth at the theoretical bounce point of **(a)**. Instead of using a pole figure representation, we plot the reflection coefficients with azimuth only for the  $117^\circ$  distance for emphasis, similar to the representation of ref. <sup>17</sup>. Here, blue and red regions represent positive and negative values, respectively, for the reflection coefficients. Dashed concentric circles in increasing order delineate  $R = -0.1, 0, 0.1$ . Note the polarity reversal of  $S^{1460}S$  relative to  $SS$  can be explained by its negative reflection coefficients at the interface.

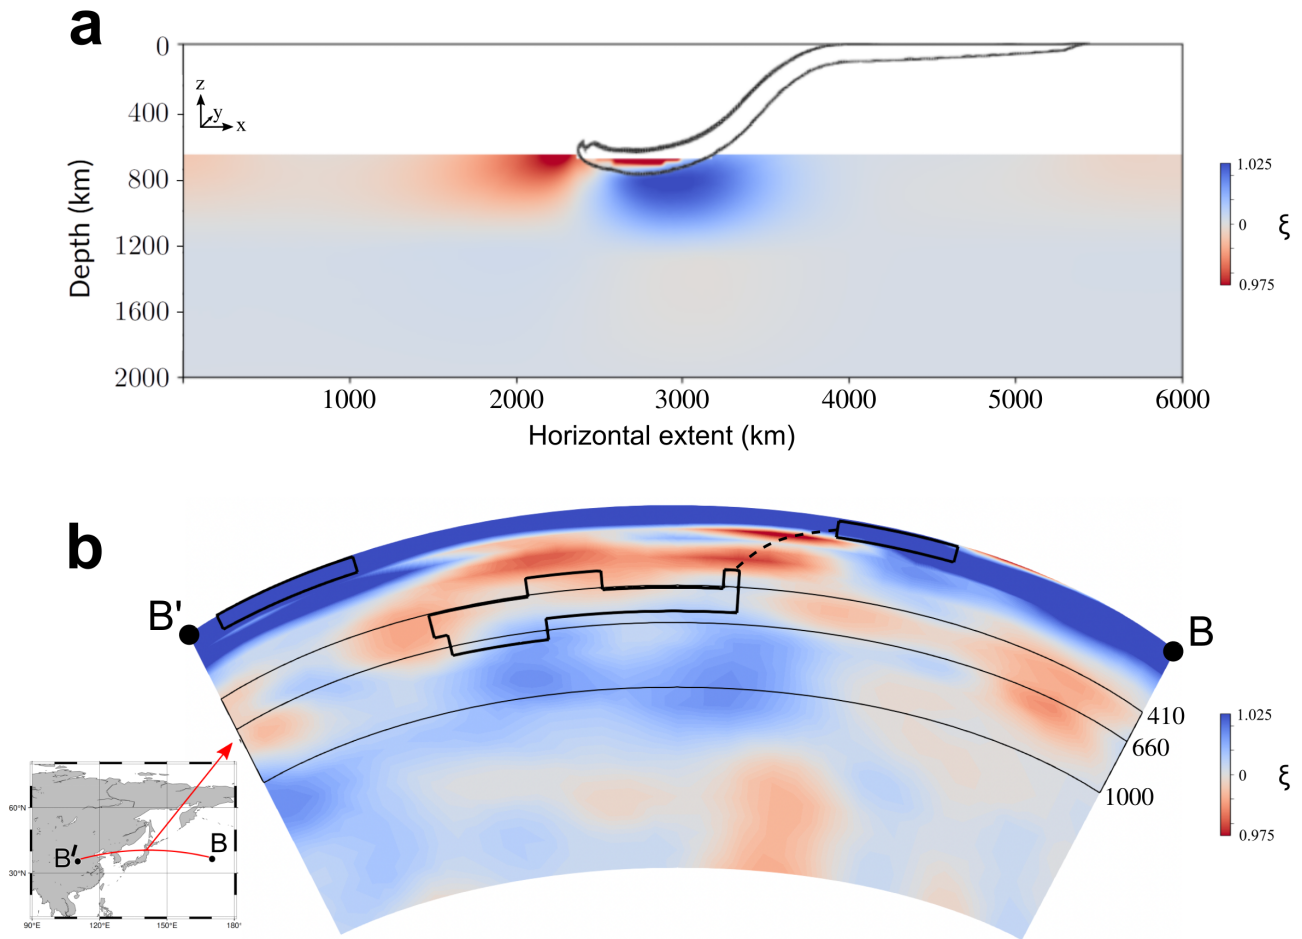

Supplementary Figure 5: **Radial anisotropy in the lower mantle for the stagnant slab model.** **a**, General patterns of large-scale radial anisotropy  $\xi$  in the lower mantle for a stagnant slab resulting from the texture evolution of pressure-dependent bridgmanite fabrics. **b**, Anisotropic tomography image of  $\xi$  in the Honshu subduction zone subduction zone retrieved from SGLOBE-Rani<sup>18</sup>.



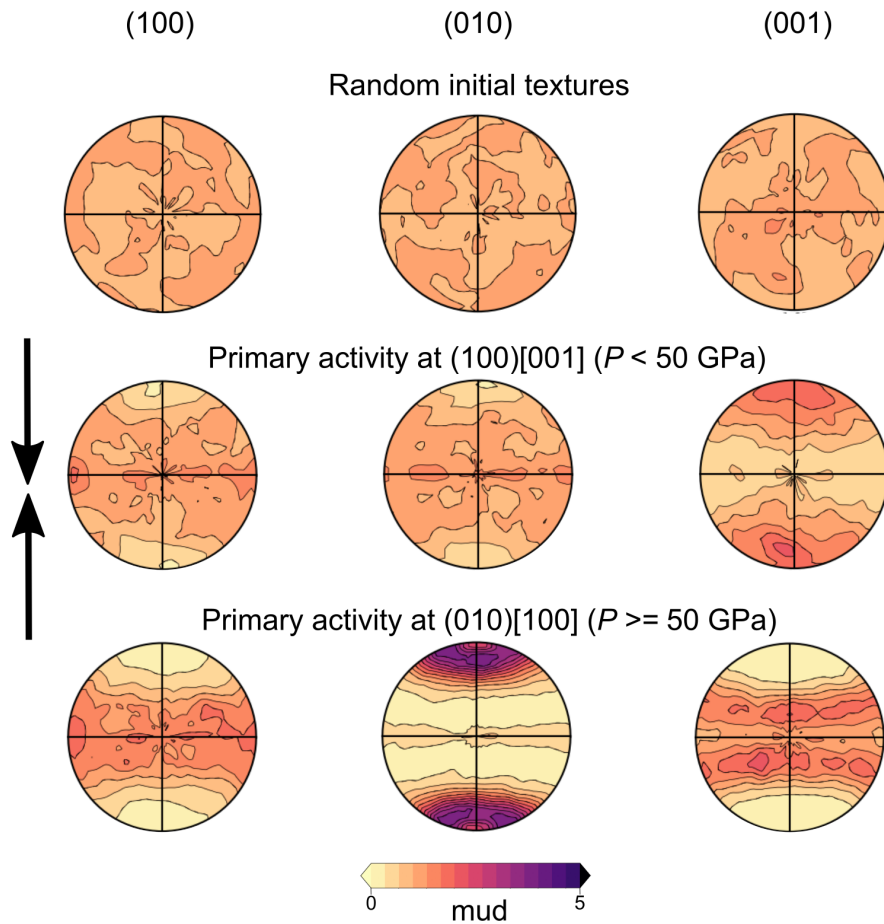

Supplementary Figure 7: **VPSC modeling of uni-axial compression.** VPSC simulation of uni-axial compression deformation on 3000 crystals making up the bridgmanite polycrystal aggregate. Starting with random initial textures (top panels), effective strains up to  $\gamma_{\text{eff}} = 1$  produce preferential orientations of (001) axes with the compression direction (Dark arrows). Here, primary activity occurs at (100)[001] (middle panels). Past 50 GPa, primary activity transitions to (010)[100] leading to strong preferential orientations of the (010) axes with the compression direction (bottom panels)

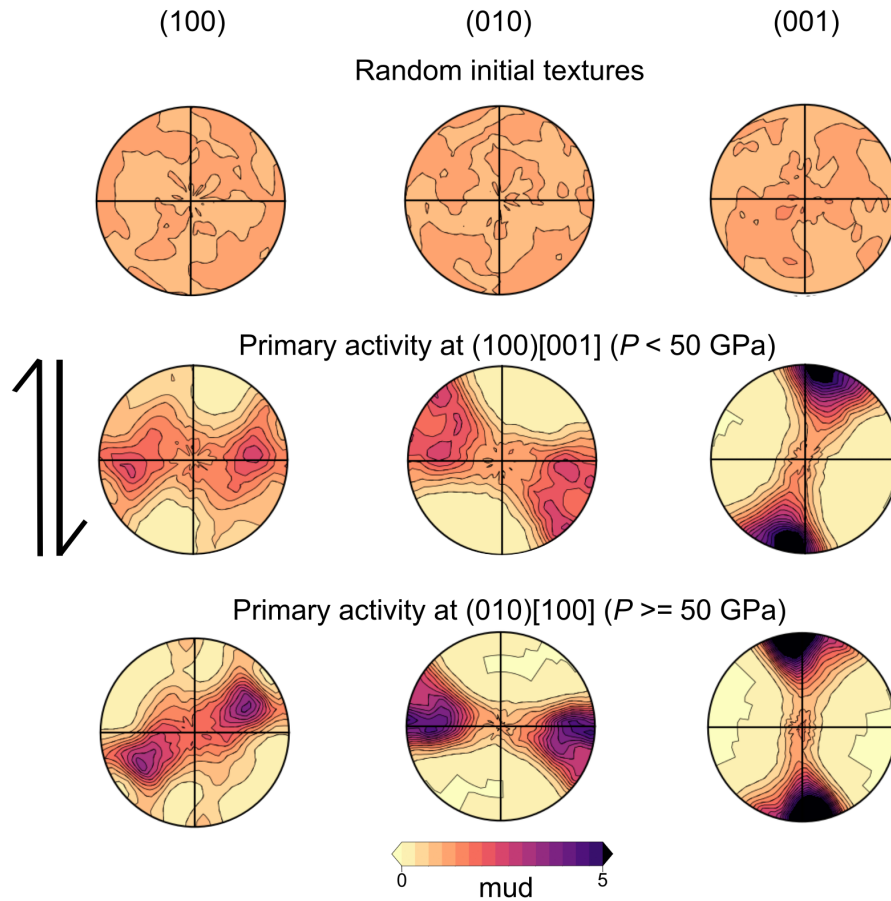

Supplementary Figure 8: **VPSC modeling of simple shear.** VPSC simulation of simple shear deformation on 3000 crystals making up the bridgmanite polycrystal aggregate. Starting with random initial textures (top panels), effective strains up to  $\gamma_{\text{eff}} = 1$  produce near vertical (001) and oblique (010) textures. Here, primary activity also occurs at (100)[001] (middle panels). Past 50 GPa, primary activity transitions to (010)[100] leading to sub-horizontal (010) and vertical (001) textures (bottom panels). Dark arrows indicate shear direction.

Predicted anisotropy resulting from an instantaneous slip transition of Bdm at exactly 50 GPa

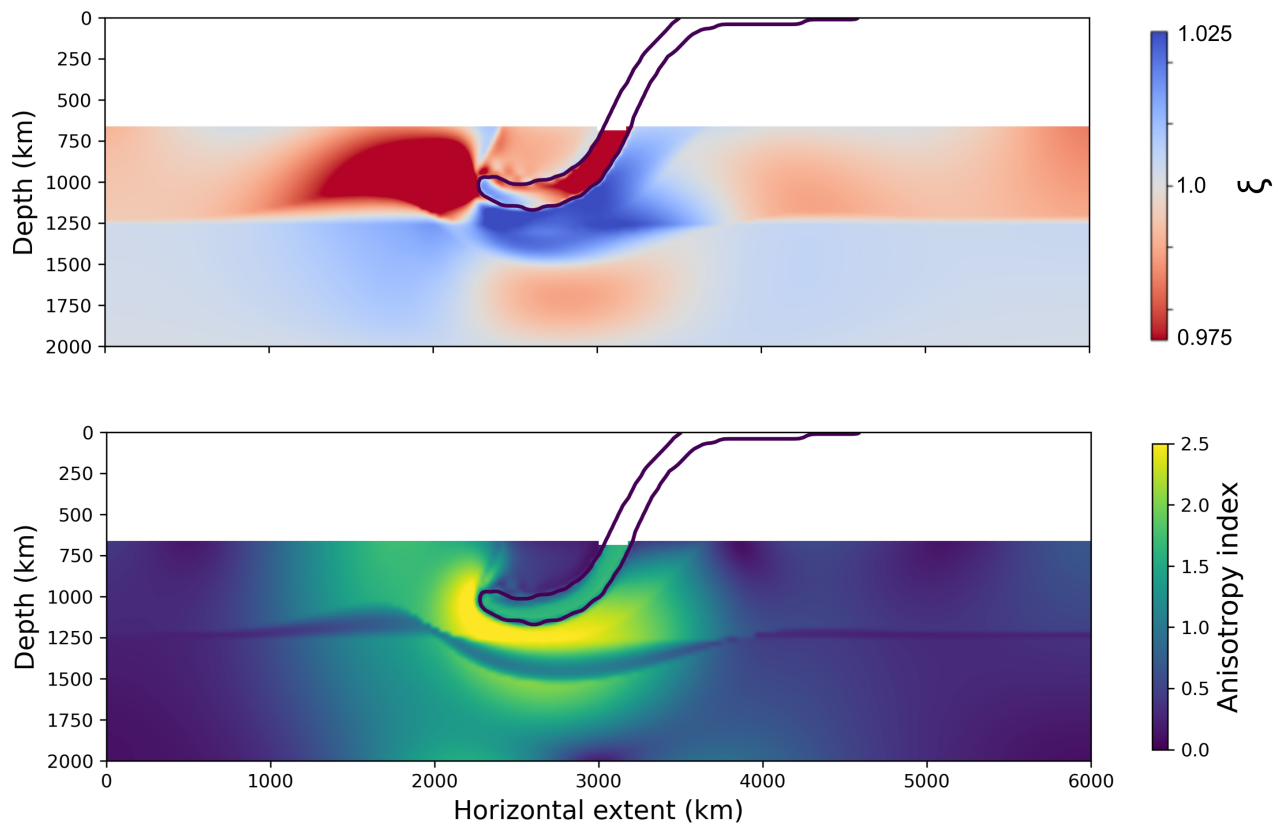

Supplementary Figure 9: **Fast fabric transition model.** Predicted large-scale radial anisotropy  $\xi$  (top panel) and anisotropy index (bottom panel) using the set of bridgmanite slip systems whose CRSS instantaneously change at 50 GPa. While in the Main Text, slip system CRSS gradually change with pressure by fitting a linear function (Supplementary Table 3).

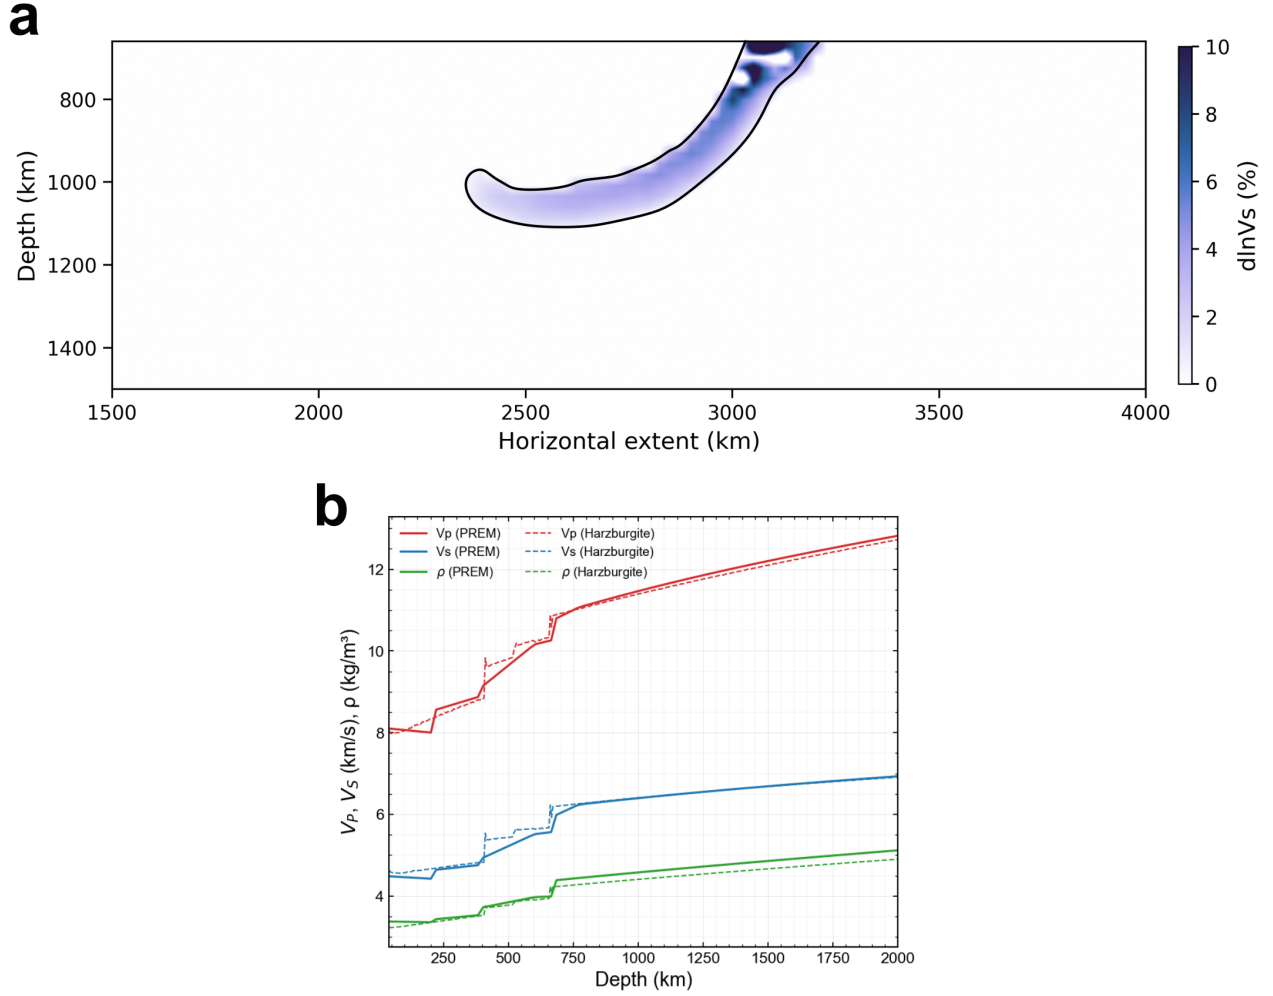

Supplementary Figure 10: **Modeling a harzburgitic slab.** **a**,  $V_S$  perturbation of the subducting slab composed of a harzburgite material relative to PREM. It is computed as follows:  $d\ln V_S = 2(V_S^{\text{harz}} - V_S^{\text{PREM}})/(V_S^{\text{harz}} + V_S^{\text{PREM}})$ . **b**, Seismic velocities ( $V_P, V_S$ ) and density ( $\rho$ ) of harzburgite (dashed lines) and PREM (solid lines) as a function of depth. The seismic properties of harzburgite are computed using the revised 1D adiabatic temperature profile of ref. <sup>23</sup>.

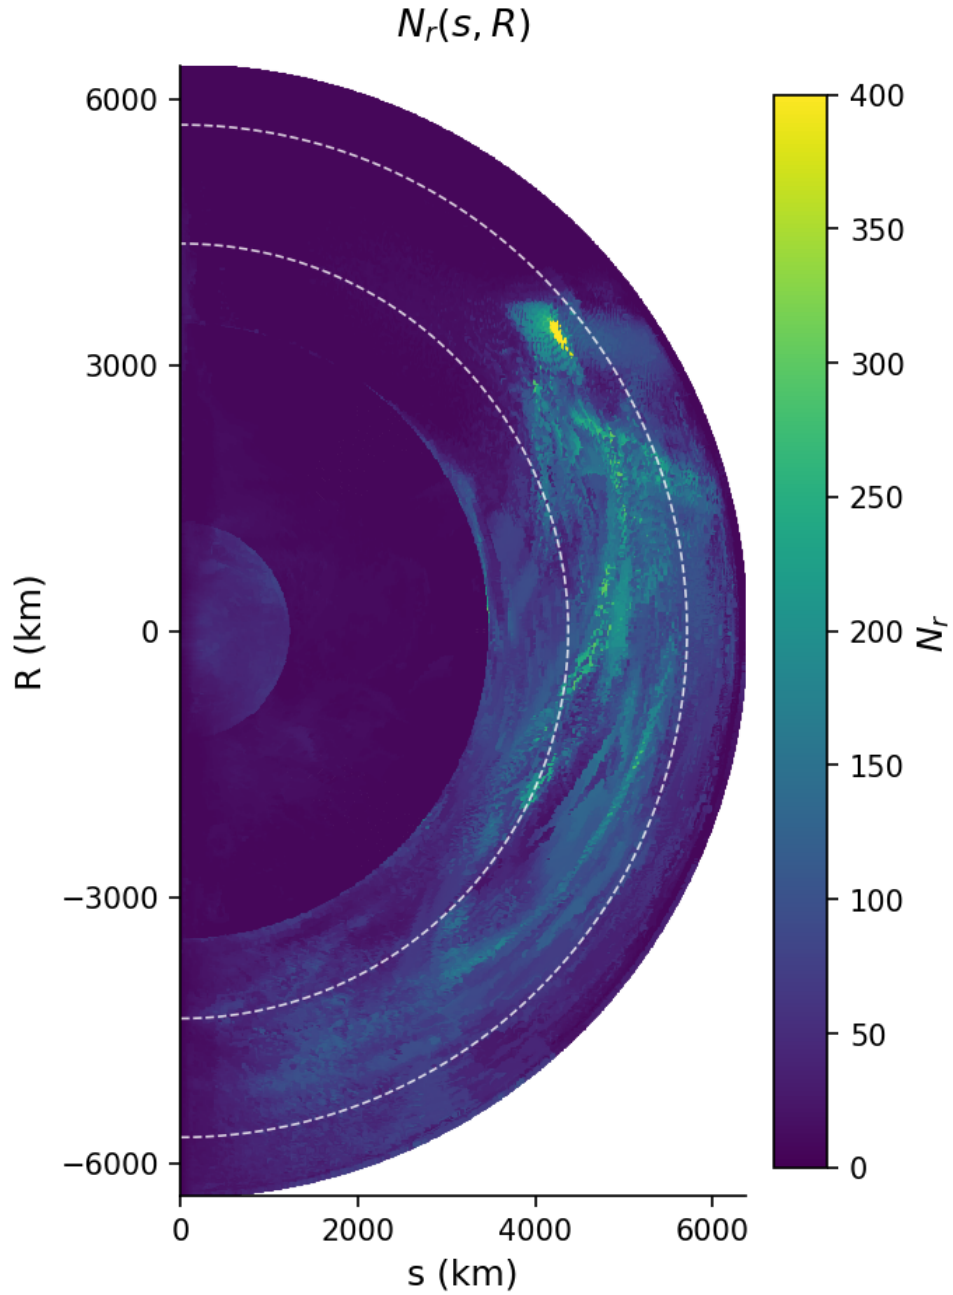

Supplementary Figure 11: **AxiSEM3D wavefield scanning.** AxiSEM3D wavefield scanning result from the test simulation with  $Nr = 1000$  for the fully-anisotropic mantle model. Here,  $N_r$  is the Fourier coefficient order, and  $R$  and  $s$  are in-plane coordinates. Color map refers to the minimum Fourier coefficient order required to accurately reconstruct azimuthal terms in both the wavefield and 3D structure. In our wavefield simulations, we thus set a constant  $N_r$  value of 400.

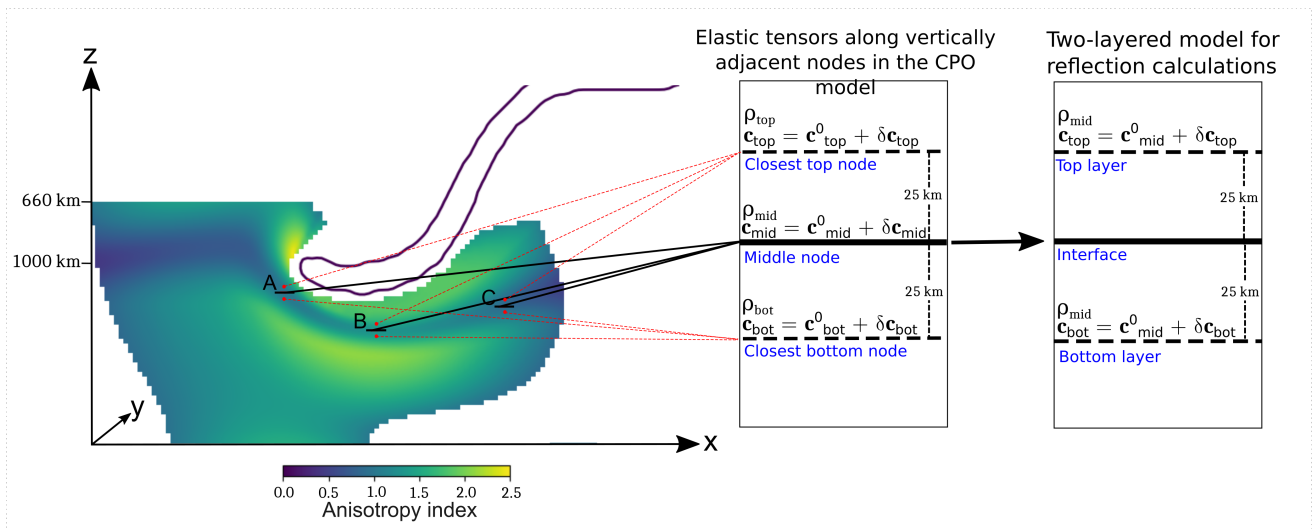

Supplementary Figure 12: **Modeling strategy to compute anisotropic reflection coefficients across the anisotropic discontinuity at Locations A, B, and C.** Here,  $\mathbf{c}$  pertains to the full elastic tensor,  $\mathbf{c}_{\text{top}}^0$  for its isotropic component,  $\delta \mathbf{c}$  for its anisotropic component, and  $\rho$  for density at the interface labeled “mid”, and top and bottom layers labeled “top” and “bot”, respectively.

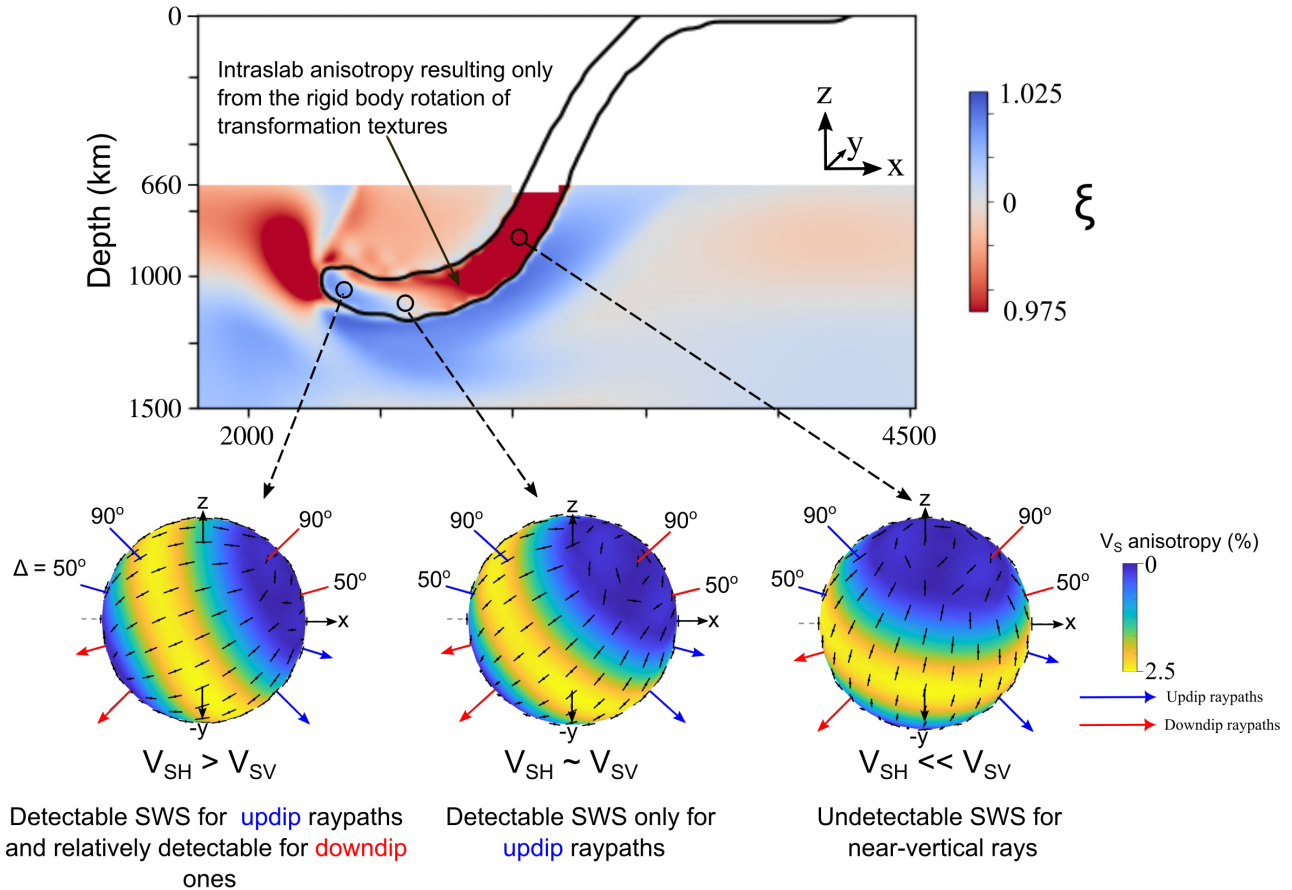

Supplementary Figure 13: **Intraslab anisotropy for the penetrating slab model.** S-wave anisotropy pole figures at selected zones inside the slab. Anisotropy amplitudes are expressed in percent; whereas fast directions are represented by the black arrow-less vectors. Arrows piercing through the sphere correspond to updip rays (in Blue) and downdip rays (in Red) incident to the anisotropic region (dark circles). Angles  $50^\circ - 90^\circ$  represent the epicentral distance corresponding to direct S phases used in source-side shear wave splitting studies. Intraslab anisotropy is modeled after the ringwoodite  $\rightarrow$  bridgmanite transformation textures constrained from experiments<sup>6</sup>.

## 76 References

- 77 [1] Kronbichler, M., Heister, T. & Bangerth, W. High accuracy mantle convection simulation  
78 through modern numerical methods. *Geophysical Journal International* **191**, 12–29 (2012).
- 79 [2] Mitrovica, J. X. & Forte, A. M. Radial profile of mantle viscosity: Results from the joint in-  
80 version of convection and postglacial rebound observables. *Journal of Geophysical Research:*  
81 *Solid Earth* **102**, 2751–2769 (1997).
- 82 [3] Karato, S.-i. & Wu, P. Rheology of the upper mantle: A synthesis. *Science* **260**, 771–778  
83 (1993).
- 84 [4] Davis, R. O. & Selvadurai, A. P. *Plasticity and geomechanics* (Cambridge university press,  
85 2005).
- 86 [5] Magali, J. K., Thomas, C., Ledoux, E. E., Capdeville, Y. & Merkel, S. On the influence  
87 of pressure, phase transitions, and water on large-scale seismic anisotropy underneath a  
88 subduction zone. *Geochemistry, Geophysics, Geosystems* **26**, e2024GC011827 (2025).
- 89 [6] Gay, J. P. *et al.* Transformation microstructures in pyrolite under stress: Implications for  
90 anisotropy in subducting slabs below the 660 km discontinuity. *Earth and Planetary Science*  
91 *Letters* **604**, 118015 (2023).
- 92 [7] Eakin, C. M. *et al.* Internal deformation of the subducted nazca slab inferred from seismic  
93 anisotropy. *Nature Geoscience* **9**, 56–59 (2016).
- 94 [8] Agrawal, S., Eakin, C. M., Portner, D. E., Rodriguez, E. E. & Beck, S. L. The deforma-  
95 tional journey of the nazca slab from seismic anisotropy. *Geophysical Research Letters* **47**,  
96 e2020GL087398 (2020).
- 97 [9] Goes, S., Agrusta, R., van Hunen, J. & Garel, F. Subduction-transition zone interaction: A  
98 review. *Geosphere* **13**, 644–664 (2017).

- 99 [10] Faccenda, M., Burlini, L., Gerya, T. V. & Mainprice, D. Fault-induced seismic anisotropy  
100 by hydration in subducting oceanic plates. *Nature* **455**, 1097–1100 (2008).
- 101 [11] Hao, M. *et al.* The seismically fastest chemical heterogeneity in the earth’s deep upper  
102 mantle—implications from the single-crystal thermoelastic properties of jadeite. *Earth and*  
103 *Planetary Science Letters* **543**, 116345 (2020).
- 104 [12] Ferreira, A. M., Faccenda, M., Sturgeon, W., Chang, S.-J. & Schardong, L. Ubiquitous  
105 lower-mantle anisotropy beneath subduction zones. *Nature Geoscience* **12**, 301–306 (2019).
- 106 [13] Browaeys, J. T. & Chevrot, S. Decomposition of the elastic tensor and geophysical applica-  
107 tions. *Geophysical Journal International* **159**, 667–678 (2004).
- 108 [14] Hirth, G. & Kohlstedt, D. Rheology of the upper mantle and the mantle wedge: A view  
109 from the experimentalists. In Eiler, J. (ed.) *Inside the Subduction Factory cover image In-*  
110 *side the Subduction Factory*, vol. 138 of *Geophysical Monograph Series*, 83–105 (American  
111 Geophysical Union, 2003).
- 112 [15] Gay, J. P. *et al.* Depth dependent deformation and anisotropy of pyrolite in the earth’s  
113 lower mantle. *Geophysical Research Letters* **51**, e2024GL109433 (2024).
- 114 [16] Keith, C. M. & Crampin, S. Seismic body waves in anisotropic media: synthetic seismo-  
115 grams. *Geophysical Journal International* **49**, 225–243 (1977).
- 116 [17] Thomas, C., Wookey, J., Brodholt, J. & Fieseler, T. Anisotropy as cause for polarity  
117 reversals of d” reflections. *Earth and Planetary Science Letters* **307**, 369–376 (2011).
- 118 [18] Chang, S.-J., Ferreira, A. M., Ritsema, J., van Heijst, H. J. & Woodhouse, J. H. Joint  
119 inversion for global isotropic and radially anisotropic mantle structure including crustal  
120 thickness perturbations. *Journal of Geophysical Research: Solid Earth* **120**, 4278–4300  
121 (2015).
- 122 [19] Di Leo, J. *et al.* Mantle flow in regions of complex tectonics: Insights from indonesia.  
123 *Geochemistry, Geophysics, Geosystems* **13** (2012).

- 124 [20] Lynner, C. & Long, M. D. Sub-slab anisotropy beneath the sumatra and circum-pacific sub-  
125 duction zones from source-side shear wave splitting observations. *Geochemistry, Geophysics,*  
126 *Geosystems* **15**, 2262–2281 (2014).
- 127 [21] Mohiuddin, A., Long, M. D. & Lynner, C. Mid-mantle seismic anisotropy beneath south-  
128 western pacific subduction systems and implications for mid-mantle deformation. *Physics*  
129 *of the Earth and Planetary Interiors* **245**, 1–14 (2015).
- 130 [22] Nowacki, A., Kendall, J.-M., Wookey, J. & Pemberton, A. Mid-mantle anisotropy in subduc-  
131 tion zones and deep water transport. *Geochemistry, Geophysics, Geosystems* **16**, 764–784  
132 (2015).
- 133 [23] Katsura, T. A revised adiabatic temperature profile for the mantle. *Journal of Geophysical*  
134 *Research: Solid Earth* **127**, e2021JB023562 (2022).
